# Supplementary material
Source: publisher site journal article supplement (https://www.spandidos-publications.com/4437/downloadSupplementary)

Figure S1. Expression of ERCC6L in recurrent tumor and primary tumor. Data from TCGA-LUAD database. ERCC6L, excision repair cross-complementation group 6 like; LUAD, lung adenocarcinoma; TCGA, The Cancer Genome Atlas.

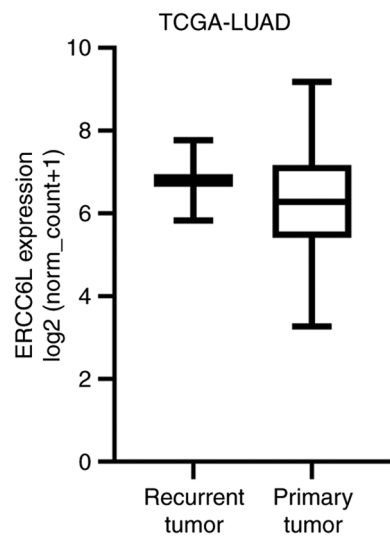

Supplement: Supplementary file 1 [file downloadSupplementary]
